# Supplementary material
Source: publisher site journal article supplement (https://www.dovepress.com/article/116810)
Supplement: Supplementary file 1 [file get_supplementary_file.php%3Ff%3D116810.pdf]

**Table S1: Summary of included studies**

| Study Name<br>Setting<br>Sponsor                                     | Control arm;<br>Active arm(s) (N,<br>randomized to arm)                              | Background<br>treatment<br>during trial                                            | Enrolment<br>criteria                                         | Study end point: OR<br>reaching <7% target<br>compared to control                                                           | Study end point: Difference in<br>A1C compared to control <sup>†</sup>                                                             | Study Design                                                                                                                                                                                   |
|----------------------------------------------------------------------|--------------------------------------------------------------------------------------|------------------------------------------------------------------------------------|---------------------------------------------------------------|-----------------------------------------------------------------------------------------------------------------------------|------------------------------------------------------------------------------------------------------------------------------------|------------------------------------------------------------------------------------------------------------------------------------------------------------------------------------------------|
| HARMONY-1 <sup>35</sup><br>Multicenter (Int'l)<br>GlaxoSmithKline    | PBO (155);<br>ALBI 30 mg QW (155)                                                    | PIO (≥ 30 mg or<br>max tolerated)<br>+/- MET (≥ 1.5<br>mg/day or max<br>tolerated) | ≥ 18 years old;<br>A1C 7-10;<br>BMI 20-45 kg/m <sup>2</sup>   | At 52 weeks v PBO:<br><br>ALBI 30 mg:<br>4.59 (95% CI: 2.63, 8.01)***                                                       | At 52 weeks vs PBO:<br><br>ALBI 30 mg:<br>-0.76 (95% CI: -0.96, -0.56)***                                                          | Randomized, double-blind,<br>parallel arm. Change in A1C<br>adjusted using ANCOVA                                                                                                              |
| HARMONY-2 <sup>36</sup><br>Multicenter (Int'l)<br>GlaxoSmithKline    | PBO (101);<br>ALBI 30 mg QW (101);<br>ALBI 30-50 mg QW (99);                         | None                                                                               | ≥ 18 years old;<br>A1C NR;<br>BMI 20-45 kg/m <sup>2</sup>     | At 52 weeks vs PBO:<br><br>ALBI 30 mg:<br>3.52 (95% CI: 1.89, 6.56)***<br><br>ALBI 30-50 mg:<br>2.47 (95% CI: 1.31, 4.63)** | At 52 weeks vs PBO:<br><br>ALBI 30 mg:<br>-0.85 (95% CI: -1.12, -0.58)***<br><br>ALBI 30-50 mg:<br>-1.04 (95% CI: -1.31, -0.77)*** | Randomized, double-blind,<br>parallel arm. Change in A1C<br>adjusted using ANCOVA.<br><br>ALBI 30 mg titrated to 50 mg<br>week 12                                                              |
| HARMONY-3 <sup>37 74</sup><br>Multicenter (Int'l)<br>GlaxoSmithKline | PBO (101);<br>SITA 100 mg QD (302);<br>ALBI 30/50 mg QW<br>(302);<br>GLIM 2 mg (307) | MET ≥ 1.5 g                                                                        | ≥ 18 years old;<br>A1C 7-10;<br>BMI 20-45 kg/m <sup>2</sup>   | At 104 weeks vs PBO:<br><br>ALBI 30-50 mg:<br>3.43 (95% CI: 1.89, 6.24)***                                                  | At 104 weeks vs PBO:<br><br>ALBI 30-50 mg:<br>-0.91. (95% CI -1.16, -0.65)***                                                      | Randomized, double-blind,<br>parallel arm. Change in A1C<br>adjusted using ANCOVA<br><br>Titration for ALBI to 50 mg and<br>GLIM to 4 mg if A1C exceeded<br>threshold of 7.5% after 12 weeks   |
| HARMONY-4 <sup>38</sup><br>Multicenter (Int'l)<br>GlaxoSmithKline    | INS-GLAR (263);<br>ALBI 30/50 mg QW<br>(516)                                         | MET ≥ 1.5 g/day<br>+/- SU                                                          | ≥ 18 years old;<br>A1C 7-10;<br>BMI 20-45 kg/m <sup>2</sup>   | At 52 weeks vs INS-GLAR<br><br>ALBI 30-50 mg:<br>0.95 (95% CI: 0.68, 1.32)                                                  | At 52 weeks vs INS-GLAR:<br><br>ALBI 30-50 mg:<br>0.12 (95% CI: -0.03, 0.27)                                                       | Randomized, open-label,<br>parallel arm. Change in A1C<br>adjusted using ANCOVA.<br><br>ALBI dose could be uptitrated to<br>50 mg week 4                                                       |
| HARMONY-5 <sup>39</sup><br>Multicenter (Int'l)<br>GlaxoSmithKline    | PBO (115);<br>ALBI 30/50 mg QW<br>(271);<br>PIO 30-45 mg QD (277);                   | MET ≥ 1.5 g (or<br>max tolerated ) +<br>GLIM 4 mg/day                              | ≥ 18 years old;<br>A1C 7-10;<br>BMI 20-45 kg/m <sup>2</sup>   | At 52 weeks vs PBO:<br><br>ALBI 30-50 mg:<br>4.46 (95% CI: 2.21, 8.98)***                                                   | At 52 weeks vs PBO:<br><br>ALBI 30-50 mg:<br>-0.88 (95% CI: -1.08, -0.68)***                                                       | Randomized, double-blind,<br>parallel arm. Change in A1C<br>adjusted using ANCOVA.<br>ALBI dose could be uptitrated to<br>50 mg if required; GLIM does<br>could be reduced if hypo<br>occurred |
| HARMONY-6 <sup>40</sup><br>Multicenter (Int'l)<br>GlaxoSmithKline    | INS-LISP TID (292);<br>ALBI 30/50 mg QW<br>(294)                                     | INS-GLAR +/-<br>MET or PIO or<br>α-Gi                                              | ≥ 18 years old;<br>A1C 7-10.5;<br>BMI 20-45 kg/m <sup>2</sup> | At 26 weeks vs INS-GLAR:<br><br>ALBI 30-50 mg:<br>1.26 (95% CI: 0.87, 1.83)                                                 | At 26 weeks vs INS-GLAR:<br><br>ALBI 30-50 mg:<br>-0.16 (95% CI: -0.33, 0.01) <sup>‡</sup>                                         | Randomized, open-label,<br>parallel arm. Change in A1C<br>adjusted using ANCOVA. Non-<br>inferiority threshold.<br><br>ALBI dose could be uptitrated to<br>50 mg from week 8                   |

| Study Name<br>Setting<br>Sponsor                                  | Control arm;<br>Active arm(s) (N,<br>randomized to arm)                                  | Background<br>treatment<br>during trial              | Enrolment<br>criteria                                                                                              | Study end point: OR<br>reaching <7% target<br>compared to control                                                                                              | Study end point: Difference in<br>A1C compared to control <sup>‡</sup>                                                                                                     | Study Design                                                                                                                                                                                                              |
|-------------------------------------------------------------------|------------------------------------------------------------------------------------------|------------------------------------------------------|--------------------------------------------------------------------------------------------------------------------|----------------------------------------------------------------------------------------------------------------------------------------------------------------|----------------------------------------------------------------------------------------------------------------------------------------------------------------------------|---------------------------------------------------------------------------------------------------------------------------------------------------------------------------------------------------------------------------|
| HARMONY-7 <sup>41</sup><br>Multicenter (Int'l)<br>GlaxoSmithKline | LIRA 1.8 mg QD (419);<br>ALBI 30-50 mg QW<br>(422)                                       | MET, SU or TZD,<br>or any<br>combination of<br>these | ≥ 18 years old;<br>A1C 7-10;<br>BMI 20-45 kg/m <sup>2</sup>                                                        | At 32 weeks vs LIRA<br><br>ALBI 30-50 mg:<br>0.68 (95% CI: 0.52, 0.90)**                                                                                       | At 32 weeks vs LIRA<br><br>ALBI 30-50 mg:<br>0.21 (95% CI: 0.08, 0.34)** †                                                                                                 | Randomized, open-label,<br>parallel arm. Change in A1C<br>adjusted using ANCOVA. Non-<br>inferiority threshold.<br><br>ALBI 30 mg titrated to 50 mg<br>week 6, LIRA 0.6 mg to 1.2 mg<br>week 1 and 1.8 mg week 2          |
| AWARD-1 <sup>42</sup><br>Multicenter (Int'l)<br>Eli Lilly and Co. | PBO (141);<br>EXE 10 µg BID (276);<br>DULA 0.75 mg QW<br>(280);<br>DULA 1.5 mg QW (279)  | MET ≥ 1.5 g/day<br>+ PIO 30-45<br>mg/day             | ≥ 18 years old;<br>A1C 7-11 (OAD<br>monotherapy),<br>A1C 7-10 (OAD<br>combination);<br>BMI 23-45 kg/m <sup>2</sup> | At 26 weeks vs PBO:<br><br>EBID:<br>1.46 (95% CI: 0.94, 2.26)<br>DULA 0.75 mg:<br>2.57 (95% CI: 1.65, 3.99)***<br>DULA 1.5 mg:<br>4.79 (95% CI: 3.01, 7.62)*** | At 26 weeks vs PBO:<br><br>EBID:<br>-0.53 (95% CI: -0.73, -0.33)***<br>DULA 0.75 mg:<br>-0.84 (95% CI: -1.01, -0.67)***<br>DULA 1.5 mg:<br>-1.05 (95% CI: -1.22, -0.88)*** | Randomized, double-blind,<br>parallel arm. Change in A1C<br>adjusted using ANCOVA.<br><br>EXE 5 µg BID for 4 weeks then<br>10 µg BID                                                                                      |
| AWARD-2 <sup>43</sup><br>Multicenter (Int'l)<br>Eli Lilly and Co. | INS-GLAR (262);<br>DULA 0.75 mg QW<br>(272);<br>DULA 1.5 mg QW (273)                     | MET + GLIM<br>(max tolerated)                        | ≥ 18 years old;<br>A1C 7-11 (OAD<br>monotherapy),<br>A1C 7-10 (OAD<br>combination);<br>BMI 23-45 kg/m <sup>2</sup> | At 26 weeks vs INS-GLAR:<br><br>DULA 0.75 mg:<br>1.75 (95% CI: 1.23, 2.50)**<br>DULA 1.5 mg:<br>2.88 (95% CI: 2.02, 4.12)***                                   | At 26 weeks vs INS-GLAR:<br><br>DULA 0.75 mg:<br>-0.24 (95% CI: -0.38, -0.10)***<br>DULA 1.5 mg:<br>-0.51 (95% CI: -0.65, -0.37)***                                        | Randomized, open-label,<br>parallel arm. Change in A1C<br>adjusted using ANCOVA.<br><br>INS-GLAR titration based on<br>blood glucose measures                                                                             |
| AWARD-3 <sup>44</sup><br>Multicenter (Int'l)<br>Eli Lilly and Co. | MET 1.5-2 g (268);<br>DULA 0.75 mg QW<br>(270);<br>DULA 1.5 mg QW (269)                  | None                                                 | ≥ 18 years old;<br>A1C 6.5-9.5;<br>BMI 23-45 kg/m <sup>2</sup> ;<br>T2D for 3mths-<br>5yrs                         | At 26 weeks MET:<br><br>DULA 0.75 mg:<br>1.45 (95% CI: 1.03, 2.05)*<br>DULA 1.5 mg:<br>1.38 (95% CI: 0.98, 1.96)                                               | At 26 weeks vs MET:<br><br>DULA 0.75 mg:<br>-0.15 (95% CI: -0.32, 0.02) †<br>DULA 1.5 mg:<br>-0.22 (95% CI: -0.36, -0.08)**                                                | Randomized, double-blind,<br>parallel arm. Change in A1C<br>adjusted using ANCOVA. Non-<br>inferiority test and gatekeeping<br>approached to superiority.<br><br>MET titrated to 2.0 g (or max<br>tolerated up to 4 week) |
| AWARD-4 <sup>45</sup><br>Multicenter (Int'l)<br>Eli Lilly and Co. | INS-GLAR (296);<br>DULA 0.75 mg QW<br>(293);<br>DULA 1.5 mg QW (295)                     | Prandial INS-<br>LISP                                | ≥ 18 years old;<br>A1C 7-11;<br>BMI 23-45 kg/m <sup>2</sup>                                                        | At 26 weeks vs INS-GLAR:<br><br>DULA 0.75 mg:<br>1.69 (95% CI: 1.19, 2.39)**<br>DULA 1.5 mg:<br>1.59 (95% CI: 1.13, 2.25)**                                    | At 26 weeks vs INS-GLAR:<br><br>DULA 0.75 mg:<br>-0.17 (95% CI: -0.33, -0.02)*<br>DULA 1.5 mg:<br>-0.22 (95% CI: -0.38, -0.07)**                                           | Randomized, open-label,<br>parallel arm. Change in A1C<br>adjusted using ANCOVA.<br><br>INS titration allowed based on<br>blood glucose levels                                                                            |
| AWARD-5 <sup>46</sup><br>Multicenter (Int'l)<br>Eli Lilly and Co. | PBO (177);<br>SITA 100 mg QD (315);<br>DULA 0.75 mg QW<br>(302);<br>DULA 1.5 mg QW (304) | MET ≥ 1.5 g/day                                      | 18-75 years old;<br>A1C 8-9.5;<br>BMI 25-40 kg/m <sup>2</sup> ;<br>T2D for ≥ 6mths                                 | At 26 weeks PBO:<br><br>DULA 0.75 mg:<br>4.63 (95% CI: 3.02, 7.11)***<br>DULA 1.5 mg:<br>5.86 (95% CI: 3.81, 9.01)***                                          | At 26 weeks PBO:<br><br>DULA 0.75 mg:<br>-1.05 (95% CI: -1.21, -0.88)***<br>DULA 1.5 mg:<br>-1.26 (95% CI: -1.42, -1.09)***                                                | Randomized, double-blind,<br>parallel arm. Change in A1C<br>adjusted using ANCOVA.<br>Superiority threshold with p-<br>value adjusted using<br>gatekeeping approach.                                                      |

| Study Name<br>Setting<br>Sponsor                                                                                                         | Control arm;<br>Active arm(s) (N,<br>randomized to arm)       | Background<br>treatment<br>during trial                               | Enrolment<br>criteria                                                                    | Study end point: OR<br>reaching <7% target<br>compared to control                                                 | Study end point: Difference in<br>A1C compared to control <sup>‡</sup>                                                 | Study Design                                                                                                                                                                                                                                |
|------------------------------------------------------------------------------------------------------------------------------------------|---------------------------------------------------------------|-----------------------------------------------------------------------|------------------------------------------------------------------------------------------|-------------------------------------------------------------------------------------------------------------------|------------------------------------------------------------------------------------------------------------------------|---------------------------------------------------------------------------------------------------------------------------------------------------------------------------------------------------------------------------------------------|
| AWARD-6 <sup>47</sup><br><br>Multicenter (Int'l)<br><i>Eli Lilly and Co.</i>                                                             | LIRA 1.8 mg QD (300);<br><br>DULA 1.5 mg QW (299)             | MET ≥ 1.5 g/day                                                       | ≥ 18 years old;<br>A1C 7-10;<br>BMI ≥ 45 kg/m <sup>2</sup>                               | At 26 weeks vs LIRA:<br><br>DULA 1.5 mg:<br>1.02 (95% CI: 0.72, 1.44)                                             | At 26 weeks vs LIRA:<br><br>DULA 1.5 mg:<br>-0.06 (95% CI: -0.19, 0.07)                                                | Randomized, open-label,<br>parallel arm. Change in A1C<br>adjusted using ANCOVA. Non-<br>inferiority test.<br><br>LIRA: 0.6 mg/day 1 week then<br>1.2 mg 1 week then 1.8 mg                                                                 |
| Buse 2004 <sup>48</sup><br><br>Multicenter (USA)<br><i>Amylin<br/>Pharmaceuticals<br/>(AstraZeneca) &amp;<br/>Eli Lilly and Co.</i>      | PBO (123);<br><br>EXE 5 µg BID (125);<br>EXE 10 µg BID (129); | SU (max<br>effective)                                                 | FPG < 240 mg/dl;<br>A1C 7.1-11;<br>BMI 27-45 kg/m <sup>2</sup>                           | At 30 wks vs PBO:<br><br>EXE 5 µg:<br>4.81 (95% CI: 1.87, 12.38)**<br>EXE 10 µg:<br>6.58 (95% CI: 2.57, 16.84)*** | At 30 wks vs PBO:<br><br>EXE 5 µg:<br>-0.58 (95% CI: -0.87, -0.29)***<br>EXE 10 µg:<br>-0.98 (95% CI: -1.26, -0.70)*** | Randomized, triple-blind, parallel<br>arm<br>Change in A1C adjusted using<br>generalized linear modelling.<br><br>5 µg BID for 4 weeks then 10 µg<br>BID. Progressive 50%<br>reductions in SU dose/<br>discontinuation for<br>hypoglycemia. |
| DeFronzo 2005 <sup>49</sup><br><br>Multicenter (USA)<br><i>Amylin<br/>Pharmaceuticals<br/>(AstraZeneca) &amp;<br/>Eli Lilly and Co.</i>  | PBO (113);<br><br>EXE 5 µg BID (110);<br>EXE 10 µg BID (113)  | MET ≥ 1.5 g/day                                                       | FPG < 13.3<br>mmol/l;<br>A1C 7.1-11;<br>BMI 27-45 kg/m <sup>2</sup>                      | At 30 wks vs PBO:<br><br>EXE 5 µg:<br>3.10 (95% CI: 1.37, 7.02)**<br>EXE 10 µg:<br>5.81 (95% CI: 2.63, 12.80)***  | At 30 wks vs PBO:<br><br>EXE 5 µg:<br>-0.48 (95% CI: -0.76, -0.20)***<br>EXE 10 µg:<br>-0.86 (95% CI: -1.14, -0.58)*** | Randomized, triple-blind, parallel<br>arm. Change in A1C adjusted<br>using generalized linear<br>modelling.<br><br>5 µg BID for 4 weeks then 10 µg<br>BID                                                                                   |
| Kendall 2005 <sup>50</sup><br><br>Multicenter (USA)<br><i>Amylin<br/>Pharmaceuticals<br/>(AstraZeneca) &amp;<br/>Eli Lilly and Co.</i>   | PBO (247);<br><br>EXE 5 µg BID (245);<br>EXE 10 µg BID (241); | MET ≥ 1.5 g/day<br>+ SU (max<br>effective/min<br>recommended<br>dose) | FPG < 13.3<br>mmol/l;<br>A1C 7.5-11;<br>BMI 27-45 kg/m <sup>2</sup>                      | At 30 wks vs PBO:<br><br>EXE 5 µg:<br>4.34 (95% CI: 2.41, 7.83)***<br>EXE 10 µg:<br>6.07 (95% CI: 3.40, 10.84)*** | At 30 wks vs PBO:<br><br>EXE 5 µg:<br>-0.80 (95% CI: -1.08, -0.52)***<br>EXE 10 µg:<br>-1.00 (95% CI: -1.28, -0.72)*** | Randomized, double-blind,<br>parallel arm. Change in A1C<br>adjusted using generalized<br>linear modelling.<br><br>5 µg BID for 4 weeks then 10 µg<br>BID. Progressive 50%<br>reductions in SU dose/<br>discontinuation for hypoglycemia    |
| Moretto 2008 <sup>51</sup><br><br>Multicenter (Int'l)<br><i>Amylin<br/>Pharmaceuticals<br/>(AstraZeneca) &amp;<br/>Eli Lilly and Co.</i> | PBO (78);<br><br>EXE 5 µg BID (77);<br>EXE 10 µg BID (78)     | None                                                                  | ≥ 18 years old;<br>A1C 6.5-10;<br>BMI 25-45 kg/m <sup>2</sup> ;<br>BP < 160/110 mm<br>Hg | At 24 wks vs PBO:<br><br>EXE 5 µg:<br>2.30 (95% CI: 1.07, 4.97)*<br>EXE 10 µg:<br>2.14 (95% CI: 0.99, 4.63)       | At 24 wks vs PBO:<br><br>EXE 5 µg:<br>-0.50 (95% CI: -0.78, -0.22)***<br>EXE 10 µg:<br>-0.70 (95% CI: -0.98, -0.42)*** | Randomized, double-blind,<br>parallel arm. Change in A1C<br>adjusted using ANCOVA.<br><br>5 µg BID for 4 weeks then 10 µg<br>BID                                                                                                            |

| Study Name                                                                                                             | Control arm;                                                                            | Background treatment during trial                   | Enrolment criteria                                                                                       | Study end point: OR reaching <7% target compared to control  | Study end point: Difference in A1C compared to control <sup>‡</sup> | Study Design                                                                                                                                                                                                                                        |
|------------------------------------------------------------------------------------------------------------------------|-----------------------------------------------------------------------------------------|-----------------------------------------------------|----------------------------------------------------------------------------------------------------------|--------------------------------------------------------------|---------------------------------------------------------------------|-----------------------------------------------------------------------------------------------------------------------------------------------------------------------------------------------------------------------------------------------------|
| Setting Sponsor                                                                                                        | Active arm(s) (N, randomized to arm)                                                    |                                                     |                                                                                                          |                                                              |                                                                     |                                                                                                                                                                                                                                                     |
| DURATION-1 <sup>52</sup><br>Multicenter (Int'l)<br><i>Amylin Pharmaceuticals (AstraZeneca) &amp; Eli Lilly and Co.</i> | EXE 10 µg BID (147);<br>EXE 2 mg QW (148)                                               | None or MET, SU or TZD, or any combination of these | ≥ 16 years old;<br>FPG < 16 mmol/l;<br>A1C 7.1-11;<br>BMI 25-45 kg/m <sup>2</sup> ;<br>T2D for ≥ 2mths   | At 30 wks vs EBID:<br>EQW:<br>2.34 (95% CI: 1.45, 3.79)***   | At 30 wks vs EBID:<br>EQW:<br>-0.40 (95% CI: -0.54, -0.12)**        | Randomized, open-label, parallel arm.<br>Change in A1C adjusted using ANOVA.<br><br>5 µg BID for 4 weeks then 10 µg BID. Reductions in SU dose up to week 10.                                                                                       |
| DURATION-2 <sup>53</sup><br>Multicenter (Int'l)<br><i>Amylin Pharmaceuticals (AstraZeneca) &amp; Eli Lilly and Co.</i> | SITA 100 mg QD (172);<br>EXE 2 mg QW (170);<br>PIO 45 mg QD(172);                       | MET 1.5 g/day                                       | ≥ 18 years old;<br>A1C 7.1-11;<br>BMI 25-45 kg/m <sup>2</sup> ;                                          | At 26 wks vs SITA:<br>EQW:<br>3.21 (95% CI: 2.04, 5.07)***   | At 26 wks vs SITA:<br>EQW:<br>-0.60 (95% CI: -0.85, -0.35)***       | Randomized, double-blind, parallel arm. Change in A1C adjusted using generalized linear modelling.                                                                                                                                                  |
| DURATION-3 <sup>54</sup><br>Multicenter (Int'l)<br><i>Amylin Pharmaceuticals (AstraZeneca) &amp; Eli Lilly and Co.</i> | INS-GLAR (223);<br>EXE 2 mg QW (233)                                                    | MET ≥ 1.5 g/day +/- SU                              | ≥ 18 years old;<br>A1C 7.1-11;<br>BMI 25-45 kg/m <sup>2</sup> ;                                          | At 26 wks vs INS-GLAR:<br>EQW:<br>1.63 (95% CI: 1.11, 2.39)* | At 26 wks vs INS-GLAR:<br>EQW:<br>-0.16 (95% CI: -0.29, -0.03)*     | Randomized, open-label, parallel arm.<br>Change in A1C adjusted using repeated measures ANCOVA.<br><br>INS-GLAR titrated to glucose targets. SU dose reduction if hypoglycemia.                                                                     |
| DURATION-4 <sup>55</sup><br>Multicenter (Int'l)<br><i>Amylin Pharmaceuticals (AstraZeneca) &amp; Eli Lilly and Co.</i> | SITA 100 mg QD (163);<br>EXE 2 mg QW (248);<br>MET 2 g/day (246);<br>PIO 45 mg QD (163) | None                                                | ≥ 18 years old;<br>A1C 7.1-11;<br>BMI 23-45 kg/m <sup>2</sup> ;                                          | At 26 wks vs SITA:<br>EQW:<br>2.15 (95% CI: 1.40, 3.29)***   | At 26 wks vs SITA:<br>EQW:<br>-0.38 (95% CI: -0.62, -0.13)***       | Randomized, double-blind, parallel arm. Change in A1C adjusted using repeated measures ANCOVA.<br><br>MET increased weekly up to 2 mg<br>With further increase up to 2.5 mg/day based on glycemic control.<br>PIO increased weekly up to 45 mg/day. |
| DURATION-5 <sup>56</sup><br>Multicenter (USA)<br><i>Amylin Pharmaceuticals (AstraZeneca) &amp; Eli Lilly and Co.</i>   | EXE 10 µg BID (125);<br>EXE 2 mg QW (129)                                               | +/- up to 2 OADs (MET, SU or TZD)                   | ≥ 18 years old;<br>FPG < 15.5 mmol/l;<br>A1C 7.1-11;<br>BMI 25-45 kg/m <sup>2</sup> ;<br>T2D for ≥ 2mths | At 24 wks vs EBID:<br>EQW:<br>3.23 (95% CI: 1.92, 5.43)***   | At 24 wks vs EBID:<br>EQW:<br>-0.7 (95% CI: -0.9, -0.4)***          | Randomized, open-label, parallel arm. Change in A1C adjusted using generalized linear modelling. Non-inferiority test.<br><br>5 µg BID for 4 weeks then 10 µg BID                                                                                   |

| Study Name<br>Setting<br>Sponsor                                                                                     | Control arm;<br>Active arm(s) (N,<br>randomized to arm)                                                              | Background<br>treatment<br>during trial                   | Enrolment<br>criteria                                                                                                          | Study end point: OR<br>reaching <7% target<br>compared to control                                                   | Study end point: Difference in<br>A1C compared to control <sup>‡</sup>                                                  | Study Design                                                                                                                                                                                            |
|----------------------------------------------------------------------------------------------------------------------|----------------------------------------------------------------------------------------------------------------------|-----------------------------------------------------------|--------------------------------------------------------------------------------------------------------------------------------|---------------------------------------------------------------------------------------------------------------------|-------------------------------------------------------------------------------------------------------------------------|---------------------------------------------------------------------------------------------------------------------------------------------------------------------------------------------------------|
| DURATION-6 <sup>57</sup><br>Multicenter (Int'l)<br>Amylin<br>Pharmaceuticals<br>(AstraZeneca) &<br>Eli Lilly and Co. | LIRA 1.8 mg QD (450);<br>EXE 2 mg QW (461)                                                                           | Max or near max<br>dose of MET,<br>SU, MET+SU,<br>MET+PIO | ≥ 18 years old;<br>A1C 7.1-11;<br>BMI ≤ 45 kg/m <sup>2</sup>                                                                   | At 26 wks vs LIRA:<br>EQW:<br>0.74 (95% CI: 0.57, 0.96)*                                                            | At 26 wks vs LIRA:<br>EQW:<br>0.21 (95% CI: 0.08, 0.33)**                                                               | Randomized, open-label,<br>parallel arm. Non-inferiority test.<br><br>LIRA was up-titrated weekly in<br>0.6 mg increments                                                                               |
| LEAD-1 <sup>58</sup><br>Multicenter (Int'l)<br>Novo Nordisk A/S                                                      | PBO (114);<br>LIRA 1.2 mg QD (228);<br>LIRA 1.8 mg QD (234);<br>ROSI 4 mg/day (232);<br><u>LIRA 0.6 mg QD (233)†</u> | GLIM 2-4 mg/day                                           | 18-80 years old;<br>A1C 7-11 (OAD<br>monotherapy), 7-<br>10 (OAD<br>combination);<br>BMI ≤ 45 kg/m <sup>2</sup>                | At 26 wks vs PBO:<br>LIRA 1.2 mg:<br>6.31 (95% CI: 3.03, 13.13)***<br>LIRA 1.8 mg:<br>8.41 (95% CI: 4.06, 17.42)*** | At 26 wks vs PBO:<br>LIRA 1.2 mg:<br>-1.3 (95% CI: -1.1, -0.6)***<br>LIRA 1.8 mg:<br>-1.4 (95% CI: -1.6, -1.1)***       | Randomized, double-blind,<br>parallel arm. Change in A1C<br>adjusted using ANCOVA.<br><br>LIRA up-titrated weekly in 0.6<br>mg increments. GLIM dose<br>adjusted 2-4 mg/day in cases of<br>hypoglycemia |
| LEAD-2 <sup>59</sup><br>Multicenter (Int'l)<br>Novo Nordisk A/S                                                      | PBO (122);<br>LIRA 1.2 mg QD (241);<br>LIRA 1.8 mg QD (242);<br>GLIM 4 mg QD (244)<br><u>LIRA 0.6 mg QD (242)†</u>   | MET 2 g/day                                               | 18-80 years old;<br>A1C 7-11 (OAD<br>monotherapy), 7-<br>10 (OAD<br>combination);<br>BMI ≤ 40 kg/m <sup>2</sup>                | At 26 wks vs PBO:<br>LIRA 1.2 mg:<br>4.56 (95% CI: 2.42, 8.58)***<br>LIRA 1.8 mg:<br>6.16 (95% CI: 3.28, 11.55)***  | At 26 wks vs PBO:<br>LIRA 1.2 mg:<br>-1.1 (95% CI: -1.3, -0.9)***<br>LIRA 1.8 mg:<br>-1.1 (95% CI: -1.3, -0.9)***       | Randomized, double-blind,<br>parallel arm. Change in A1C<br>adjusted using ANCOVA.<br><br>2-3 week run-in for active arms<br><br>MET dose adjusted to 1.5-2<br>g/day if hypoglycemia or AEs             |
| LEAD-3 <sup>60</sup><br>Multicenter (Int'l)<br>Novo Nordisk A/S                                                      | GLIM 8 mg (248);<br>LIRA 1.2 mg QD (251);<br>LIRA 1.8 mg QD (246)                                                    | None                                                      | 18-80 years old;<br>A1C 7-11 (treated<br>with diet &<br>exercise), 7-10<br>(OAD<br>monotherapy);<br>BMI ≤ 45 kg/m <sup>2</sup> | At 52 wks vs GLIM:<br>LIRA 1.2 mg:<br>1.93 (95% CI: 1.33, 2.80)***<br>LIRA 1.8 mg:<br>2.68 (95% CI: 1.84, 3.89)***  | At 52 wks vs GLIM:<br>LIRA 1.2 mg:<br>-0.33 (95% CI: -0.53, -0.13)**<br>LIRA 1.8 mg:<br>-0.62 (95% CI: -0.83, -0.42)*** | Randomized, double-blind,<br>parallel arm. Change in A1C<br>adjusted using ANCOVA.<br><br>LIRA was up-titrated weekly in<br>0.6 mg increments; GLIM 2 to 4<br>mg to 8 mg over 2 weeks                   |
| LEAD-4 <sup>61</sup><br>Multicenter (Int'l)<br>Novo Nordisk A/S                                                      | PBO (177);<br>LIRA 1.2 mg QD (178);<br>LIRA 1.8 mg QD (178)                                                          | MET ≥ 1.5 g/day<br>+ ROSI 8 mg                            | 18-80 years old;<br>A1C 7-11 (OAD<br>monotherapy), 7-<br>10 (OAD<br>combination);<br>BMI ≤ 45 kg/m <sup>2</sup>                | At 26 wks vs PBO:<br>LIRA 1.2 mg:<br>3.41 (95% CI: 2.19, 5.30)***<br>LIRA 1.8 mg:<br>2.97 (95% CI: 1.91, 4.62)***   | At 26 wks vs PBO:<br>LIRA 1.2 mg:<br>-1.00 (95% CI: -1.28, -0.72)***<br>LIRA 1.8 mg:<br>-1.00 (95% CI: -1.28, -0.72)*** | Randomized, double-blind,<br>parallel arm. Change in A1C<br>adjusted using ANCOVA.<br><br>LIRA was up-titrated weekly in<br>0.6 mg increments                                                           |
| LEAD-5 <sup>62</sup><br>Multicenter (Int'l)<br>Novo Nordisk A/S                                                      | PBO (115);<br>LIRA 1.8 mg QD (232);<br>INS-GLAR (234)                                                                | MET 2 g/day +<br>GLIM 4 mg/day                            | 18-80 years old;<br>A1C 7.5-10 (OAD<br>monotherapy),<br>7-10 (OAD<br>combination);<br>BMI ≤ 45 kg/m <sup>2</sup>               | At 26 wks vs PBO:<br>LIRA 1.8 mg:<br>6.02 (95% CI: 3.42, 10.61)***                                                  | At 26 wks vs PBO:<br>LIRA 1.8 mg:<br>-1.09 (95% CI: -1.28, -0.90)***                                                    | Randomized, parallel arm.<br>Open-label INS. LIRA and LIRA-<br>placebo blinded. Change in A1C<br>adjusted using ANCOVA.<br><br>LIRA was up-titrated weekly in<br>0.6 mg increments                      |

| Study Name<br>Setting<br>Sponsor                                    | Control arm;<br>Active arm(s) (N,<br>randomized to arm) | Background<br>treatment<br>during trial | Enrolment<br>criteria                                       | Study end point: OR<br>reaching <7% target<br>compared to control    | Study end point: Difference in<br>A1C compared to control <sup>‡</sup>   | Study Design                                                                                                                                                                                                 |
|---------------------------------------------------------------------|---------------------------------------------------------|-----------------------------------------|-------------------------------------------------------------|----------------------------------------------------------------------|--------------------------------------------------------------------------|--------------------------------------------------------------------------------------------------------------------------------------------------------------------------------------------------------------|
| LEAD-6 <sup>63</sup><br><br>Multicenter (Int'l)<br>Novo Nordisk A/S | EXE 10 µg BID (231);<br><br>LIRA 1.8 mg QD (233);       | MET +/- SU (max<br>tolerated)           | 18-80 years old;<br>A1C 7-11;<br>BMI ≤ 45 kg/m <sup>2</sup> | At 26 wks vs EBID:<br><br>LIRA 1.8 mg:<br>1.57 (95% CI: 1.09, 2.27)* | At 26 wks vs EBID:<br><br>LIRA 1.8 mg:<br>-0.33 (95% CI: -0.47, -0.18)** | Randomized, open-label,<br>parallel arm. Change in A1C<br>adjusted using ANCOVA. Non-<br>inferiority.<br><br>LIRA was up-titrated weekly in<br>0.6 mg increments; EXE 5 µg<br>BID to 10 µg BID after 4 weeks |

α-Gi, alpha-glucosidase inhibitor; ALBI, albiglutide; ANCOVA, analysis of covariance; ANOVA, analysis of variance; BID, twice daily; DULA, dulaglutide; EXE, exenatide; GLIM, glimepiride; INS-GLAR, insulin glargine; INS-LISP, insulin lispro; LIRA, liraglutide; MET, metformin; OAD, oral antihyperglycemic drug; PIO, pioglitazone; PBO, placebo; QD, once daily; QW, once weekly; ROSI, rosiglitazone; SITA, sitagliptin; SU, sulfonylurea; TZD, thiazolidinedione; † not licensed dose so this arm is not included in the analysis; \* p<0.05; \*\* p<0.01; \*\*\* p<0.001; ‡ p-value calculated from two-sided t-test with α=0.025, p-values may differ from those reported in the publication where non-inferiority thresholds, adjusted p-values or gatekeeping approaches were used
